# Supplementary material
Source: Research Square preprint supplement (doi:10.21203/rs.3.rs-9167929/v1)
Supplement: Supplementary file 1 [file c55befd8483ab4421d0f5ac6.docx]

Section 1. Methodological Examination

1. Instruments and Reagents

Waters e2695 High-Performance Liquid Chromatograph with 2998PDA Detector (Waters Corporation, USA); Paeonol Monomer (Ruimao Biotechnology Co., Ltd.); β-Cyclodextrin (Anhui Shanhe Pharmaceutical Excipients Co., Ltd.); Paeonol reference standard (China National Institute for Food and Drug Control, Batch No.: 110708-202309, purity 99.9%); Chromatography-grade methanol from Tedia, USA; Ultrapure water (prepared using Milli-Q ultrapure water system); All other reagents were analytical grade and purchased from Sinopharm Chemical Reagent Co., Ltd.

2 Sample Preparation

2.1 Preparation of Paeonol Reference Solution

Take an appropriate amount of paeonol reference standard, precisely weigh the mass, place it in a 25 mL volumetric flask, dilute to the mark with methanol, and mix thoroughly to prepare a reference stock solution containing 1.788 mg of paeonol per mL.

2.2 Preparation of Test Solution

Take approximately 0.2 g of paeonol/β-cyclodextrin supramolecular complex, precisely weigh it, and place it in a stoppered conical flask. Precisely add 100 mL of methanol, seal tightly, and weigh the flask. Sonicate for 20 minutes, cool to room temperature, make up the weight loss, filter, precisely transfer 1 mL of the supernatant to a 10 mL volumetric flask, dilute to the mark with methanol, shake well, and the test solution is obtained.

2.3 Preparation of Negative Control Solution

Take approximately 0.2 g of β-cyclodextrin and prepare it according to the method described in Section 1.2.2 to obtain the negative control solution.

3. Chromatographic Conditions

Chromatography column: Hedera ODS-2 (C18, 4.6 mm × 250 mm, 5 μm); Mobile phase: methanol-water (60:40); Detection wavelength: 274 nm; Column temperature: 30°C; Injection volume: 10 μL; Flow rate: 0.8 mL/min.

4. Methodological Examination

4.1 Proprietary Examination


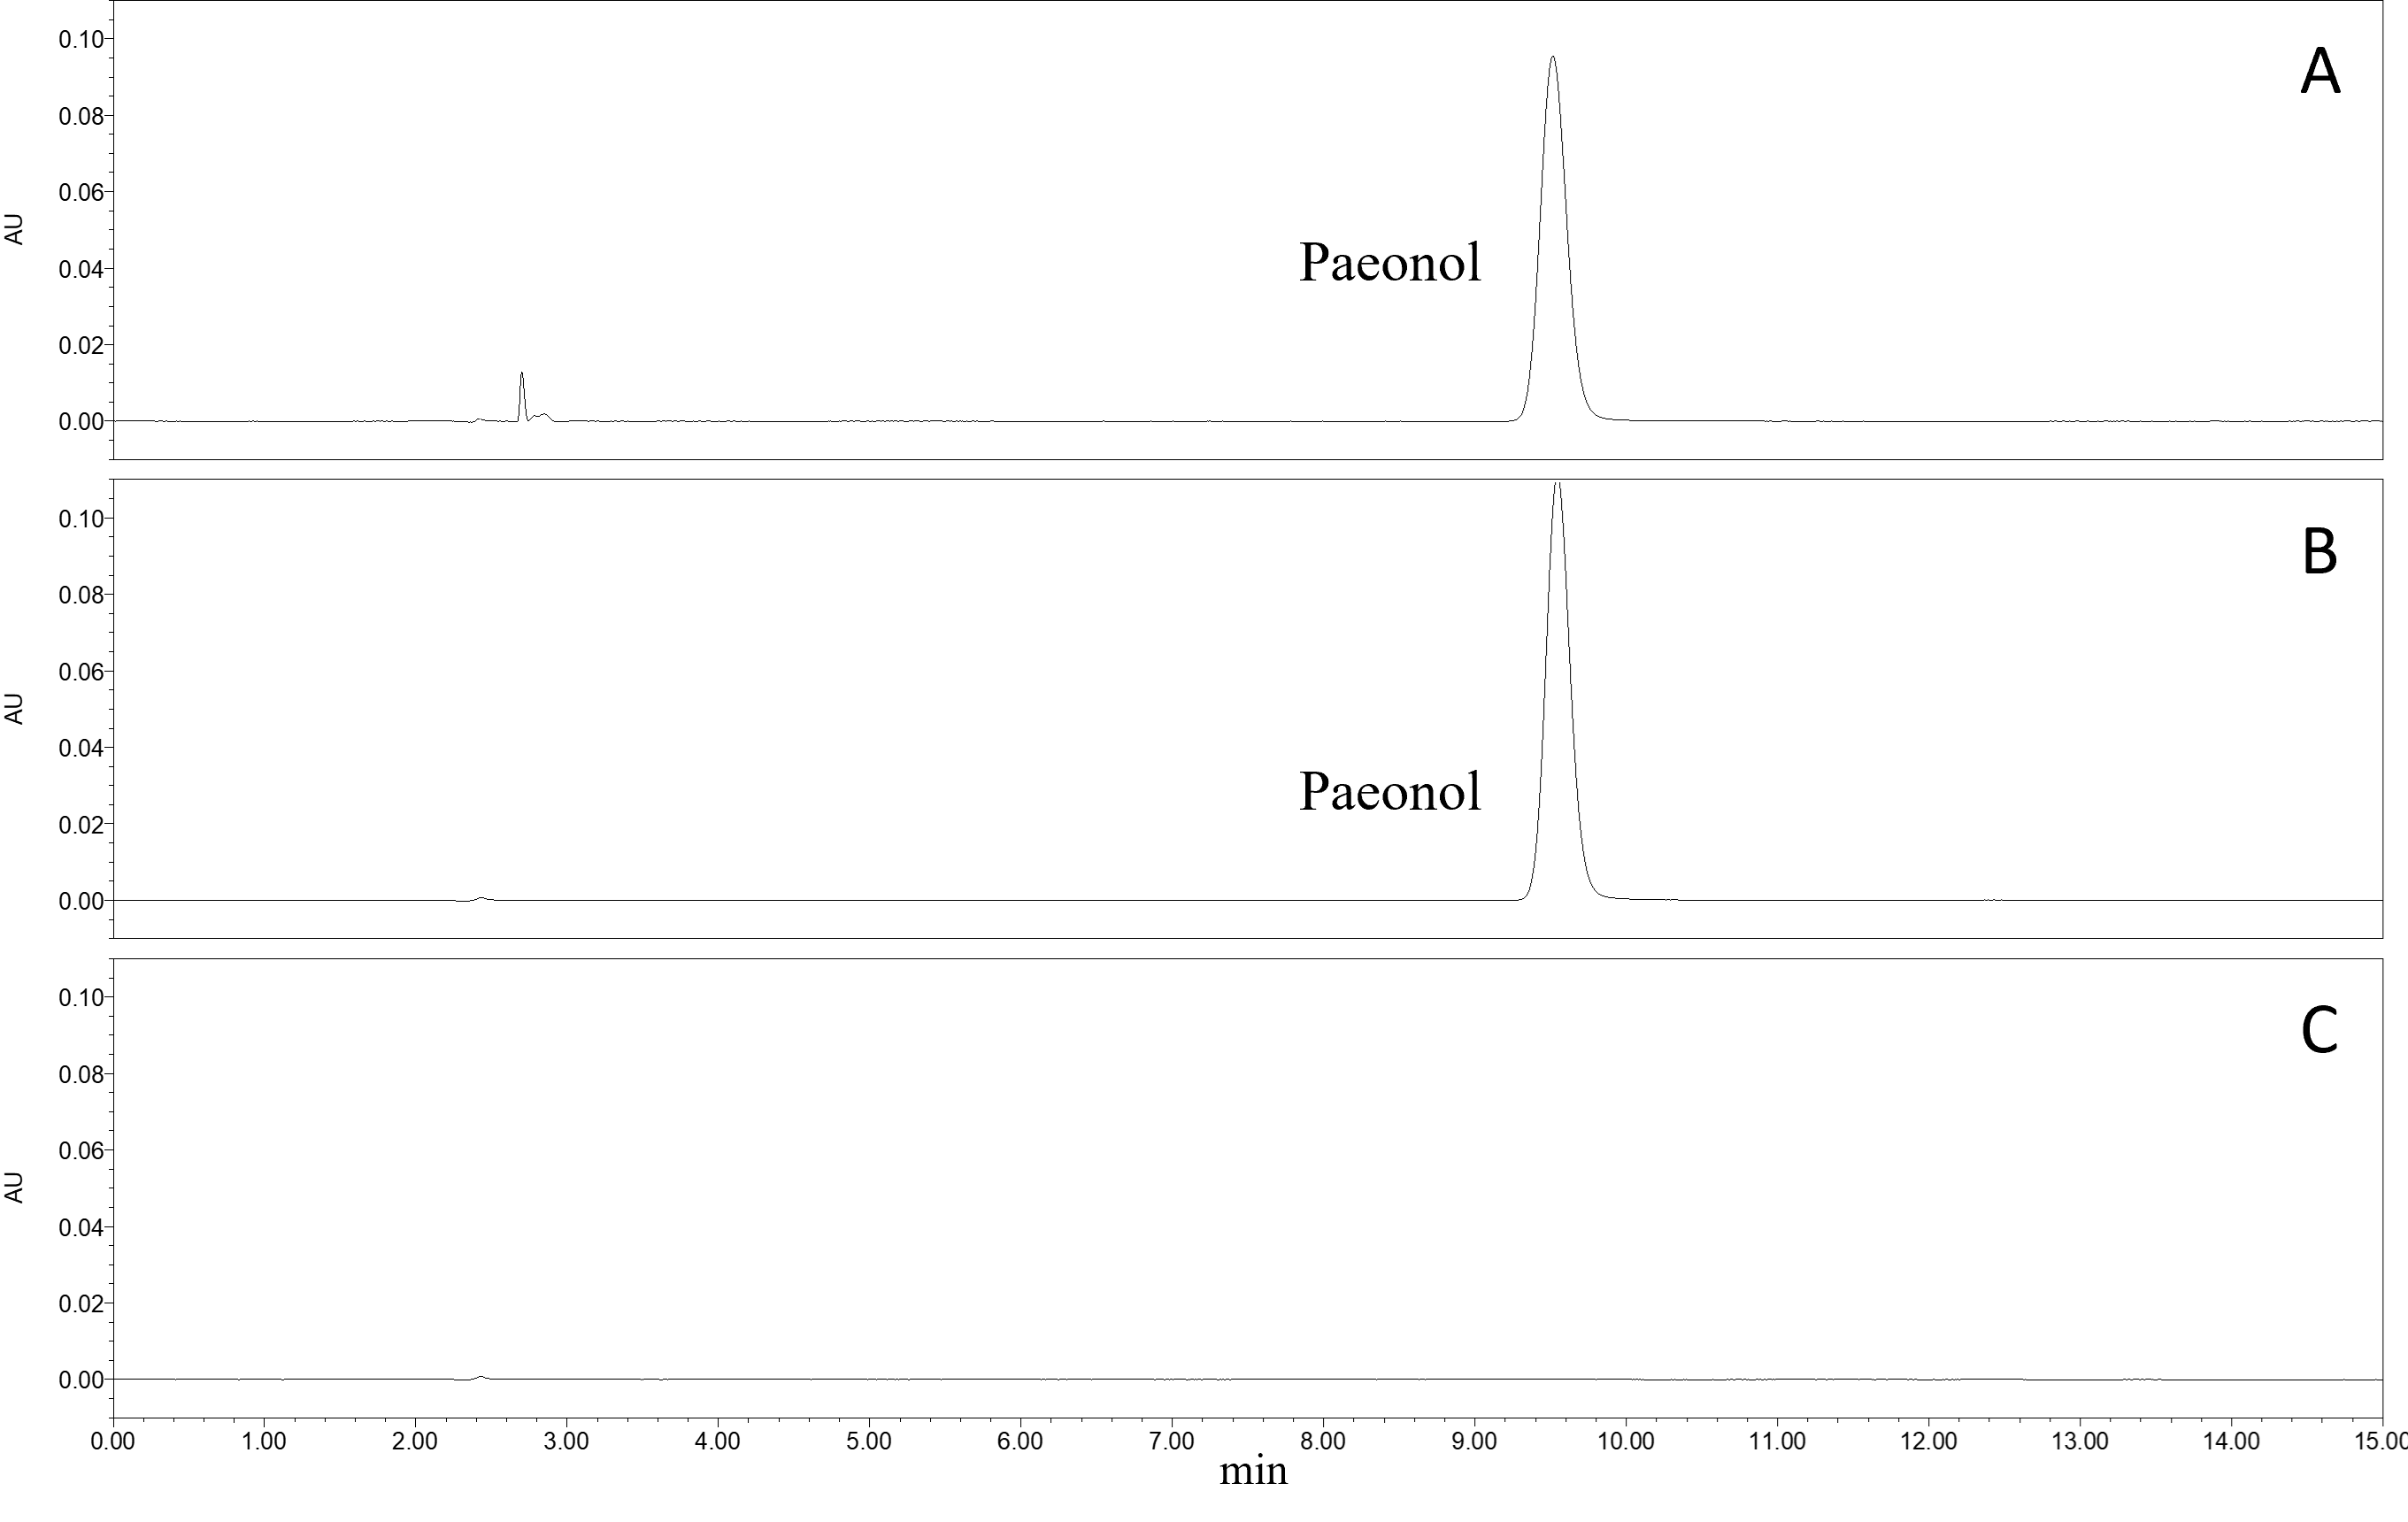
Peony alcohol reference solution, test solution, and negative control solution were injected under the conditions specified in Section 2. Results indicated no interference from the negative control solution (see figure below), demonstrating the method's good specificity.

Figure S1

(A) Paeonol Sample (B) Paeonol Reference Standard (B) Paeonol Negative Control Sample

4.2 Examination of Linear Relationships

Precise pipetting of an appropriate volume of the prepared reference solution of paeoniflorin (as specified in Section 1.2.1) was diluted using the stepwise dilution method to prepare a series of working solutions. These were injected under the chromatographic conditions described in Section 2. Linear regression was performed with peak area (Y) on the vertical axis and concentration (X, μg/mL) on the horizontal axis (as shown in the figure). The regression equation: y = 48482x, R² = 1.0000. This indicates a good linear relationship within the range of 4.34–72.53 μg/mL.

4.3 Precision Test

Precise sampling of the same paeoniflorin reference solution under item “1.2.1” was performed. Under the chromatographic conditions specified in item “2”, six consecutive injections were conducted. The peak area relative standard deviation (RSD) was calculated to be 0.45%, indicating good instrument precision.

4.4 Repeatability Test

Using samples from the same batch of paeonol/β-cyclodextrin supramolecular complexes, six test solutions were prepared according to the method described in Section 1.2.2. These were injected under the chromatographic conditions specified in Section 2. The calculated RSD for content was 0.82%, indicating good repeatability of the method.

4.5 Stability Test

Using samples of the same batch of paeonol/β-cyclodextrin supramolecular complexes, prepare the test solution according to the method described in Section 1.2.2. Inject the sample at 2 h, 4 h, 6 h, 8 h, 10 h, and 12 h under the chromatographic conditions specified in Section 2. Calculate the peak area RSD to be 0.15%, indicating good stability of the test solution within 12 hours.

4.6 Spiked Recovery Test

Take approximately 0.1 g of paeonol/β-cyclodextrin supramolecular complex samples from the same batch. Precisely add 3 mL of the 1.788 mg/mL paeonol reference standard stock solution to prepare six test solutions following the method described in Section 1.2.2. Inject the samples under the chromatographic conditions specified in Section 2. The calculated average recovery rate was 100.2%, RSD = 3.51%. The results indicate that this method exhibits good recovery performance.
